# Supplementary material for: Three-Dimensional Visualization of Defects Formed during the Synthesis of Metal–Organic Frameworks: A Fluorescence Microscopy Study
Source: Angew Chem Int Ed Engl. 2012 Nov 9;52(1):401–5. doi: 10.1002/anie.201205627 (PMC4464535; doi:10.1002/anie.201205627)
Supplement: Supplementary file 1 [file anie0052-0401-sd1.pdf]

Supporting Information

© Wiley-VCH 2012

69451 Weinheim, Germany

**Three-Dimensional Visualization of Defects Formed during the  
Synthesis of Metal–Organic Frameworks: A Fluorescence Microscopy  
Study\*\***

*Rob Ameloot, Frederik Vermoortele, Johan Hofkens, Frans C. De Schryver, Dirk E. De Vos, and  
Maarten B. J. Roelffaers\**

anie\_201205627\_sm\_miscellaneous\_information.pdf

anie\_201205627\_sm\_movie\_cubtc.avi

anie\_201205627\_sm\_movie\_mof-5.avi

**Movie S1.** Rotating three-dimensional representation of the fluorescence data recorded for the single HKUST-1 crystal shown in Figure 1 in the main text.

**Movie S2.** Rotating three-dimensional representation of the fluorescence data recorded for the surface of the single MOF-5 crystal shown in Figure 3 in the main text.

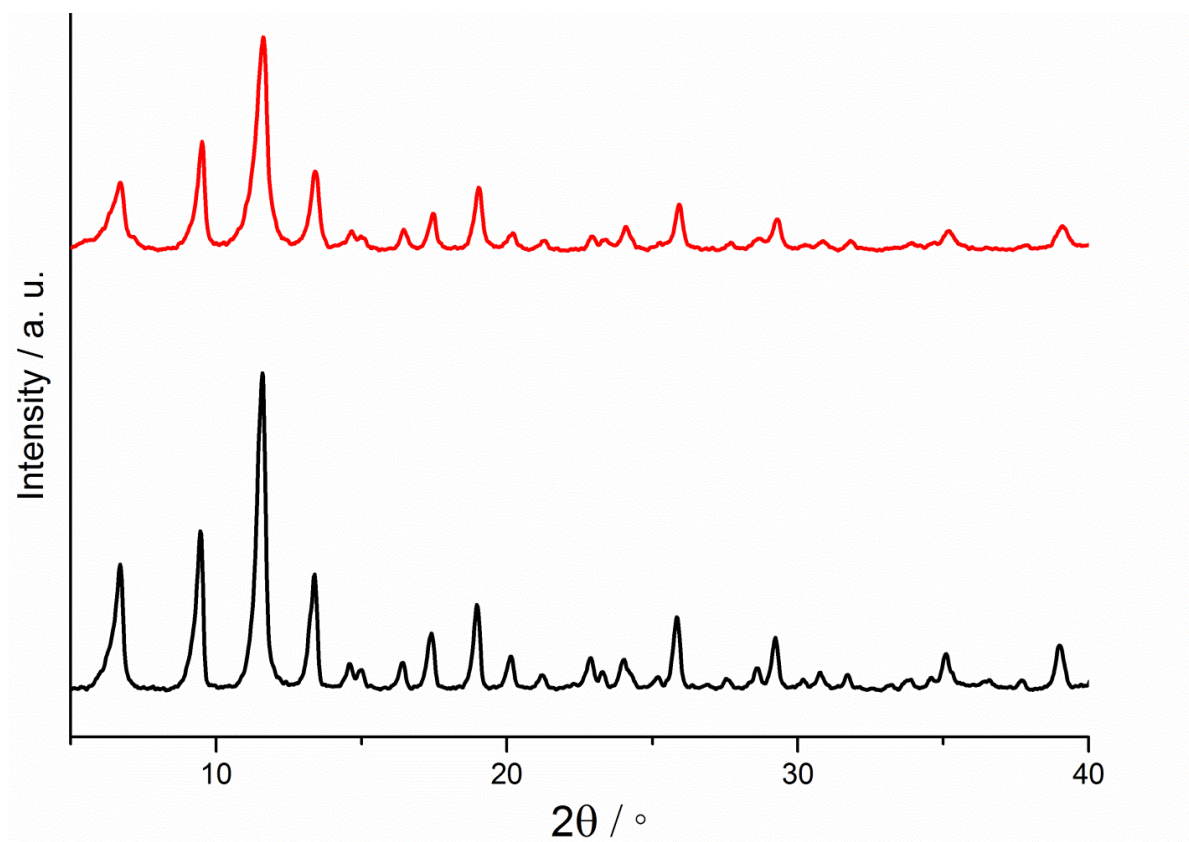

**Figure S1.** Powder XRD patterns of HKUST-1 samples obtained after a short (red) and extended (black) crystallization time of respectively 15 and 63 hours. Both samples show all diffraction peaks characteristic for HKUST-1.

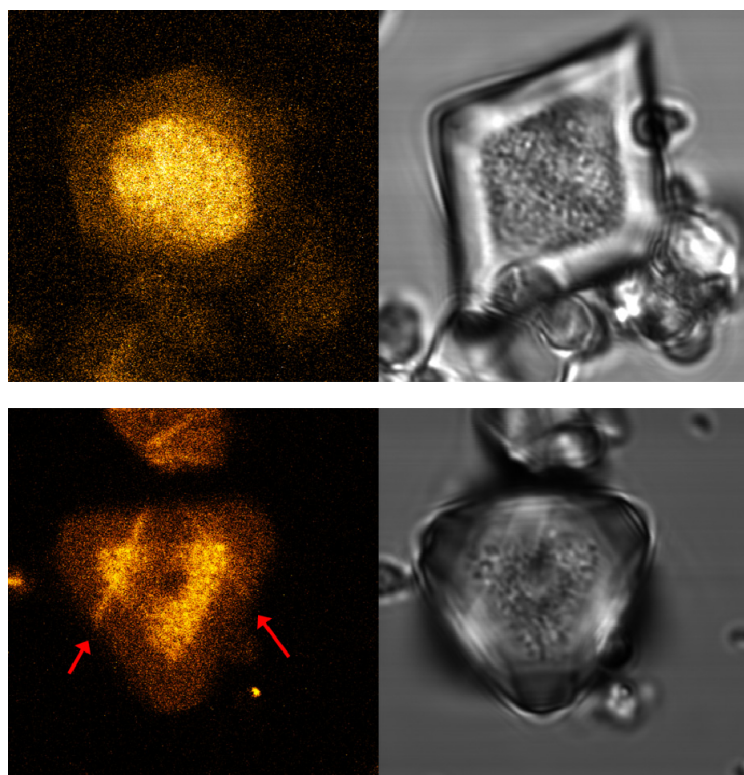

**Figure S2.** Heterogeneity of defect types observed in some HKUST-1 crystals after extended crystallization. A confocal fluorescence image and an optical micrograph of the same crystal are shown respectively on the left and the right side. The crystal on top shows a high defect density confined in the crystal interior. The crystal on the bottom displays a similar region combined with planar-type defects (red arrows).

### Synthesis of MIL-53(Ga)

MIL-53(Ga) was synthesized using a literature procedure<sup>1</sup>.

A mixture of  $\text{Ga}(\text{NO}_3)_3 \cdot \text{H}_2\text{O}$  (Pura Tronic, 99,999%), terephthalic acid ( $\text{H}_2\text{BDC}$ , Acros, 99%), HF (Chem-Lab, 40 wt%) and deionized water in a 1:2:1:100 molar ratio was placed in a Teflon-lined stainless steel autoclave. The mixture was heated to 220°C for 3 days. After filtration, the solid was washed twice with hot DMF in order to remove unreacted  $\text{H}_2\text{BDC}$  molecules, once with ethanol and dried at room temperature.

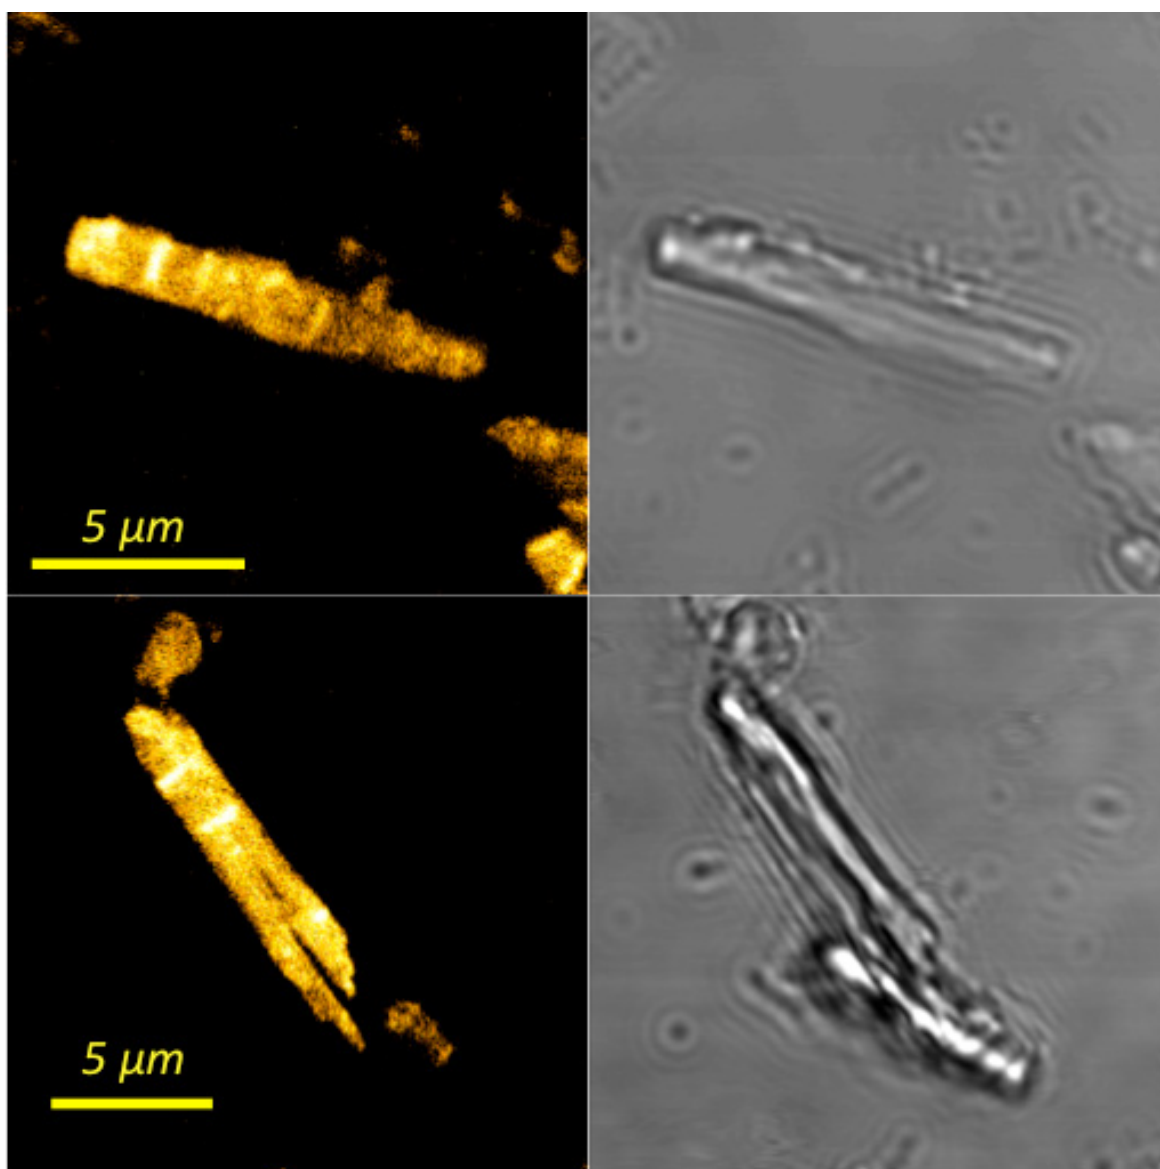

**Figure S3.** Visualization of defects in crystals of MIL-53(Ga). The structural hydroxyl sites present in the crystal lattice as part of one-dimensional chains of corner-sharing  $\text{GaO}_4(\text{OH})_2$  octahedra do not hinder the visualization of carboxylic acid defects in the material.

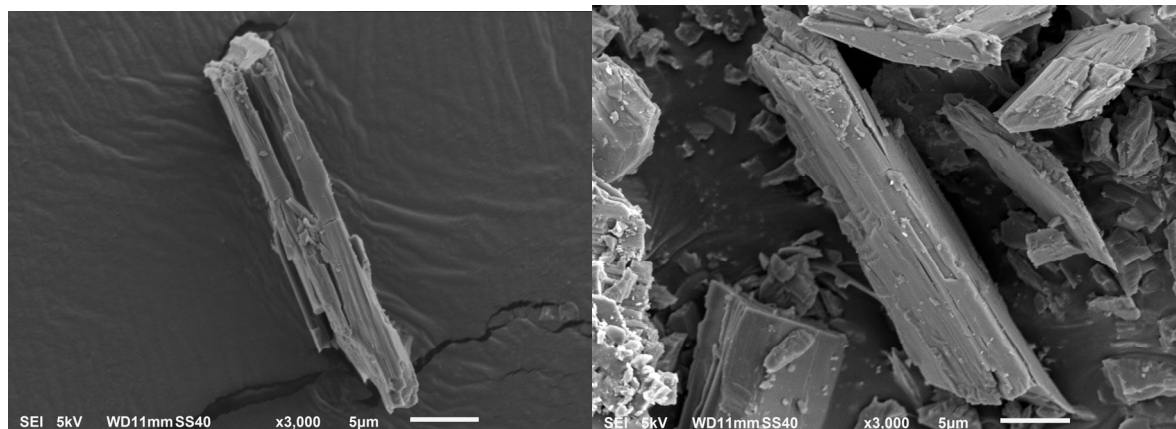

**Figure S4.** Scanning electron micrograph of individual MIL-53(Ga) crystallites. Large single crystals (left), suitable for confocal microscopy, were selected from the bulk (right).

## References

- [1] G. Chaplais, A. Simon-Masseron, F. Porcher, C. Lecomte, D. Bazer-Bachi, N. Bats, J. Patarin, *Phys. Chem. Chem. Phys.* **2009**, *11*, 5241–5245
